# Supplementary material for: Electron-deficient 4-nitrophthalonitrile passivated efficient perovskite solar cells with efficiency exceeding 22%
Source: Royal Society of Chemistry journal article supplement (doi:10.1039/d1se00188d), 2021-01-01
Supplement: d1se00188d1.pdf [file d1se00188d1.pdf]

## Supporting information

### Electron Deficient 4-Nitrophthalonitrile Passivated Efficient

### Perovskite Solar Cells with Efficiency Exceeding 22%

Longhui Deng,<sup>a,b,c</sup> Zhihao Zhang,<sup>b,c</sup> Yifeng Gao,<sup>b,c</sup> Qiu Xiong,<sup>b,c</sup> Zicheng Li,<sup>b,c</sup> Jianbin Xu,<sup>b,c</sup> Zilong Zhang,<sup>b,c</sup>  
Jun Chen<sup>\*a</sup>, Peng Gao<sup>\*b,c</sup>

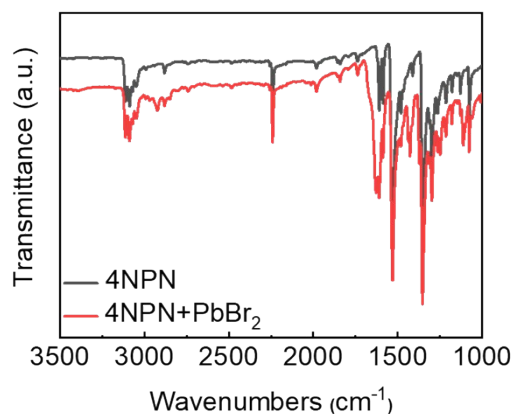

Figure S1. FTIR spectra of pure 4NPN and with PbBr<sub>2</sub> mixture.

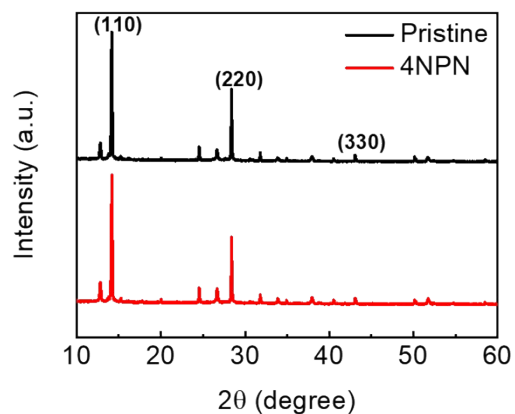

Figure S2. XRD patterns of perovskite films with and without 4NPN.

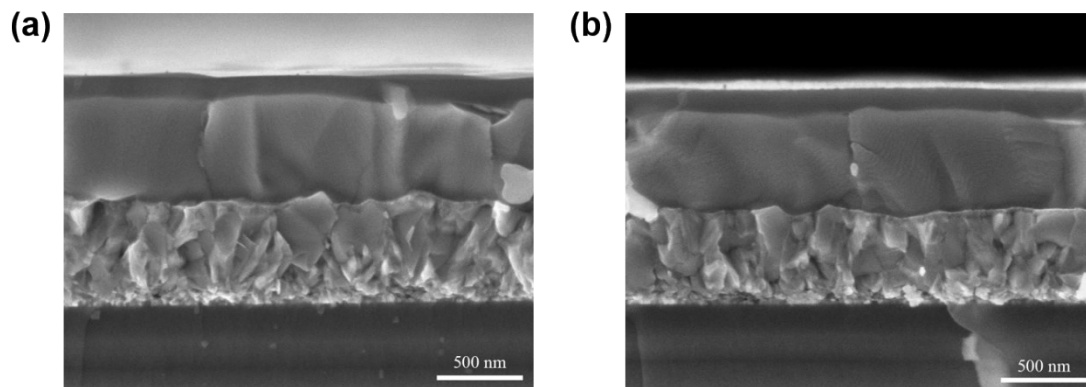

Figure S3. Cross-section SEM images of PSCs.

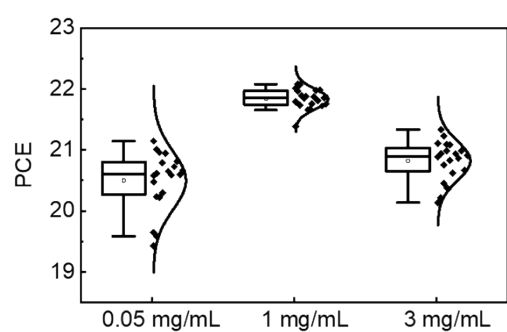

Figure S4. PCE of the PSCs with different concentration 4NPN.

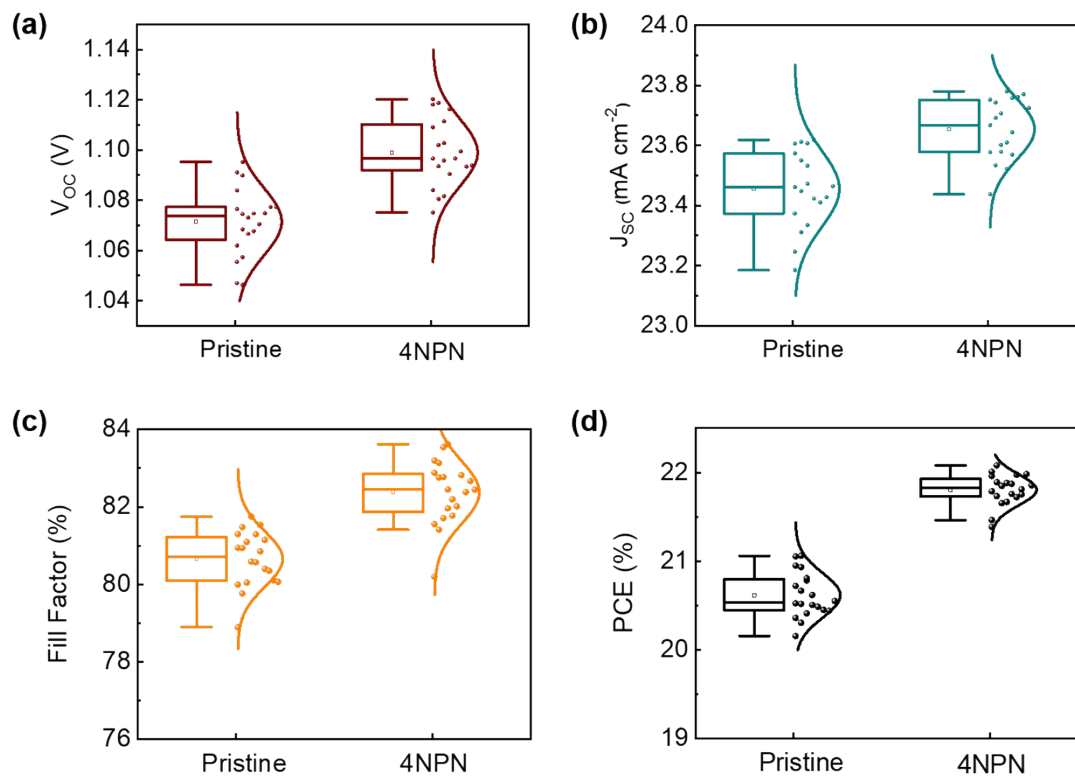

Figure S5. Count 20 perovskite solar cells without and with 4NPN of (a)  $V_{oc}$ , (b)  $J_{sc}$ , (c) FF, and (d) PCE.

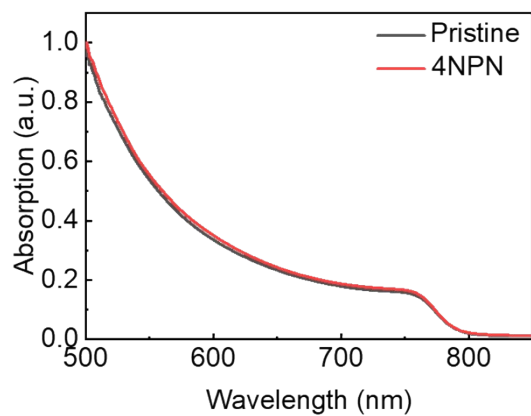

Figure S6. UV-vis absorption spectra.

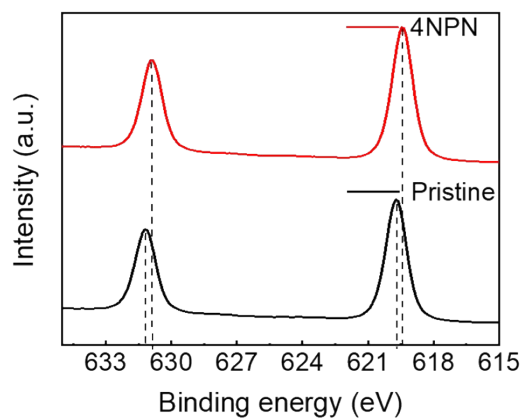

Figure S7. XPS results of I 3d core levels spectra of the pristine and adding with 4NPN perovskite surface.

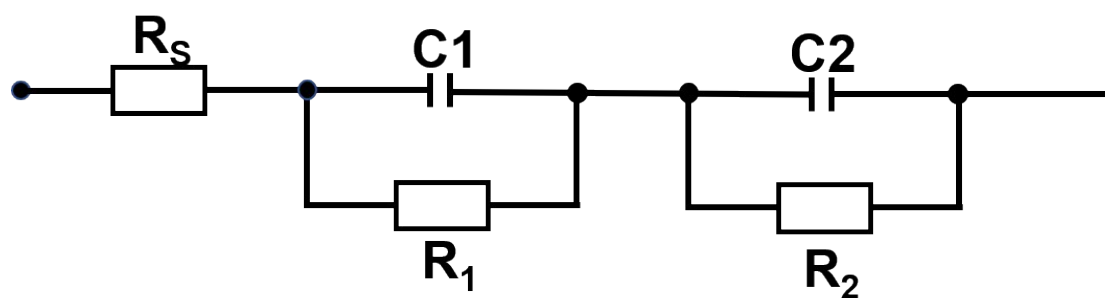

Figure S8. The equivalent circuit model of PSCs for EIS.

Table S1. Parameters of the time-resolved photoluminescence (TRPL) spectroscopy for perovskite films.

| Sample   | $A_1$ (%) | $\tau_1$ (ns) | $A_2$ (%) | $\tau_2$ (ns) | $\tau_{\text{avg}}$ (ns) |
|----------|-----------|---------------|-----------|---------------|--------------------------|
| Pristine | 59        | 8.1           | 19.4      | 70.8          | 54.50                    |
| 4NPN     | 16.78     | 48.22         | 96.8      | 232.97        | 226.51                   |
